# Supplementary material for: ANGPTL8 negatively regulates NF-κB activation by facilitating selective autophagic degradation of IKKγ
Source: PubMed Central journal article supplement (PMC5735157; doi:10.1038/s41467-017-02355-w), 2017-12-18
Supplement: 41467_2017_2355_MOESM1_ESM.pdf [file 41467_2017_2355_MOESM1_ESM.pdf]

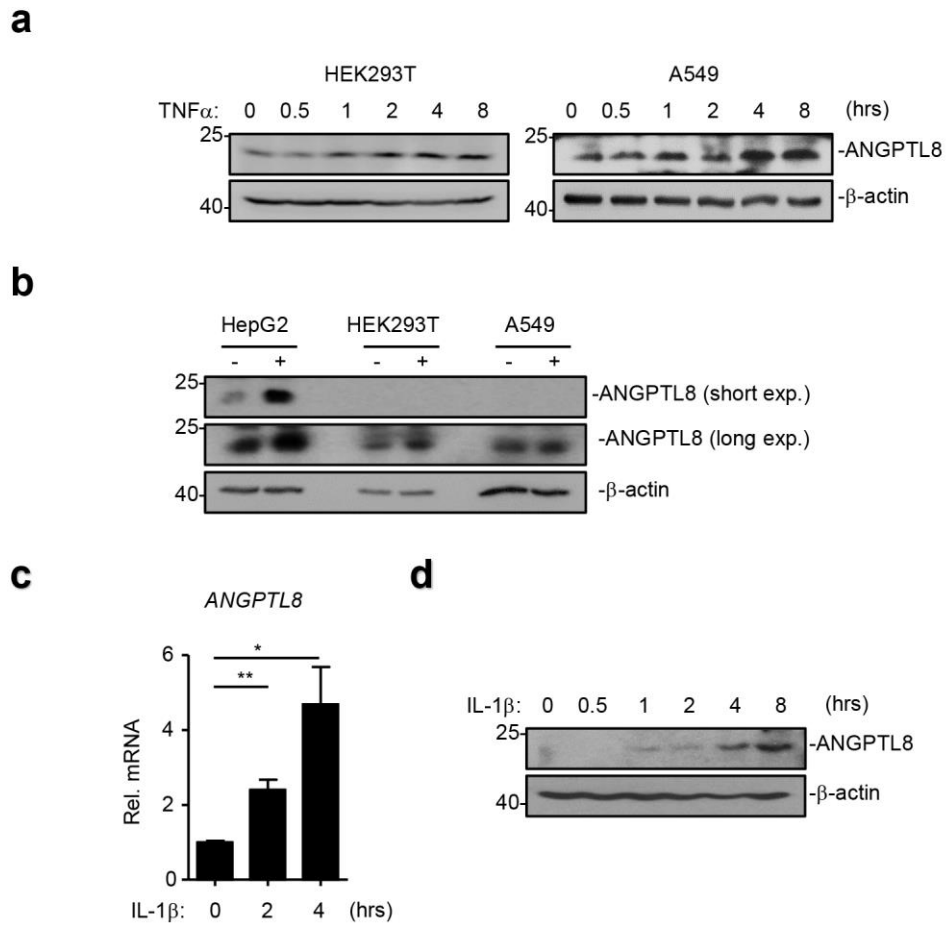

**Supplementary Figure 1. TNF $\alpha$  and IL-1 $\beta$  up-regulate the expression of ANGPTL8.** **a.** The expression level of ANGPTL8 after TNF $\alpha$  treatment. **b.** The induction of ANGPTL8 in TNF $\alpha$ -induced HEK293T or A549 cells. **c,d.** The transcription level (**c**,  $n=3$ ) and protein level (**d**) of ANGPTL8 after IL-1 $\beta$  (10 ng/mL) treatment. Data are shown as mean  $\pm$  SEM, unpaired two-tailed student's test was used for statistics (**c**),  $*p < 0.05$ ,  $**p < 0.01$ . Data are representative of three independent experiments.

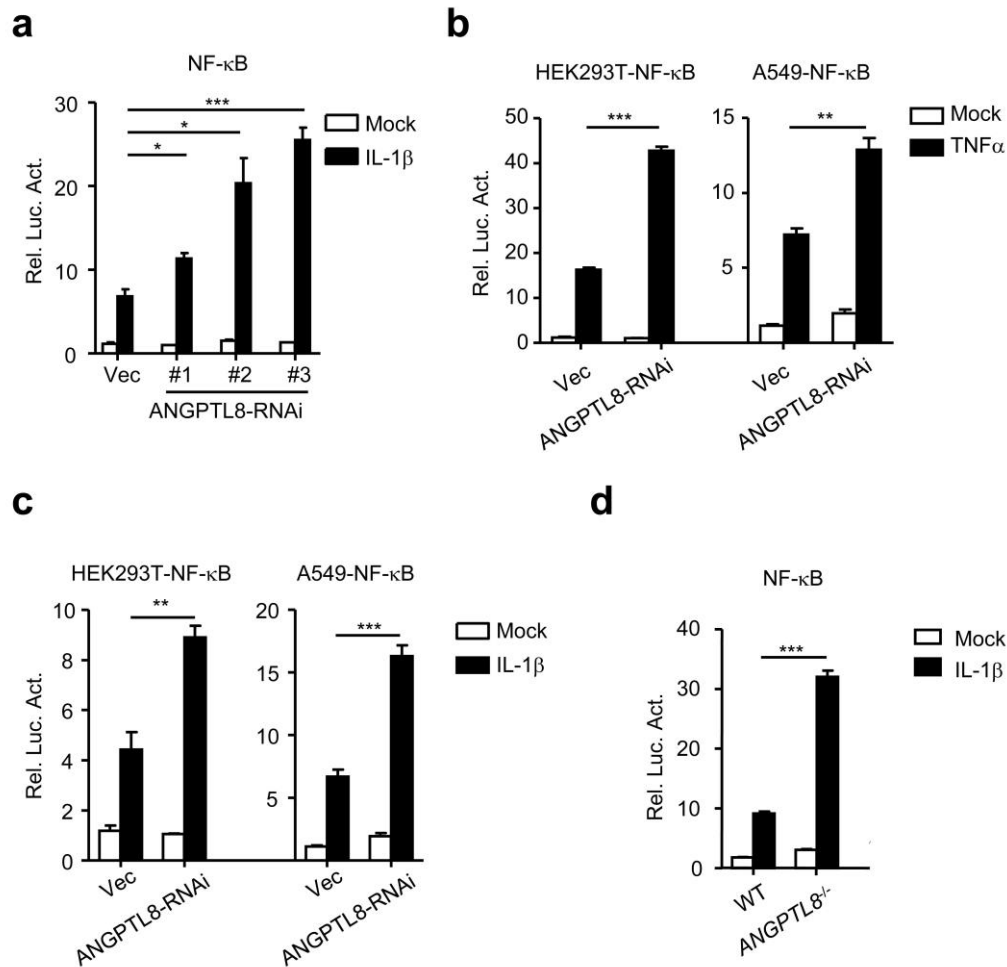

**Supplementary Figure 2. Knockdown or knockout of ANGPTL8 potentiates TNF $\alpha$ - or IL-1 $\beta$ -induced NF- $\kappa$ B activation.** **a.** Effects of ANGPTL8-RNAi on IL-1 $\beta$ -induced NF- $\kappa$ B activation in HepG2 cells (n=3). **b,c.** Effects of ANGPTL8-RNAi on TNF $\alpha$ - (**b**) or IL-1 $\beta$ - (**c**) induced NF- $\kappa$ B activation in HEK293T and A549 cells (n=3). **d.** Effects of ANGPTL8 deficiency on IL-1 $\beta$ -induced NF- $\kappa$ B activation. Data are shown as mean  $\pm$  SEM, unpaired two-tailed student's test was used for statistics, \* $p < 0.05$ , \*\* $p < 0.01$ , \*\*\* $p < 0.001$ . Data are representative of three independent experiments.

**a**

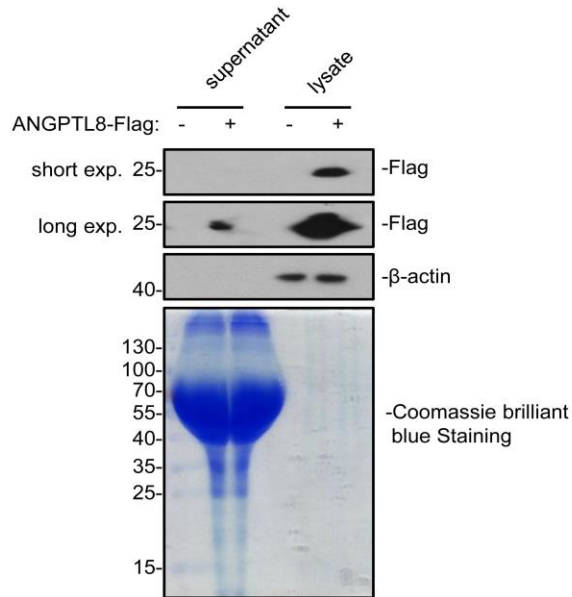

**b**

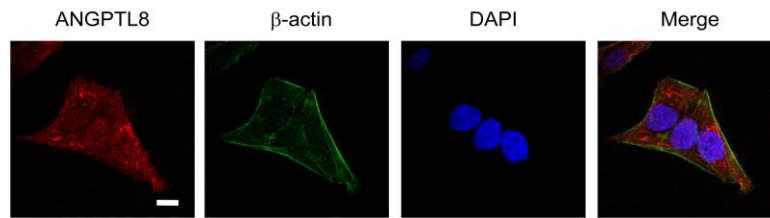

**Supplementary Figure 3. The cellular localization of ANGPTL8.** **a.** The expression of ANGPTL8 in the supernatant and lysate following gene transfection in HepG2 cells. The HepG2 cells were transfected with control vector or ANGPTL8-Flag plasmids for 48 hours, and then medium in one well of 6-well plates was precipitated with 20% trichloroacetic acid and resuspended by 150  $\mu$ l RIPA buffer (supernatant), while cell pellet in the same well were lysed by 150  $\mu$ l RIPA buffer directly (lysate). For immunoblots, 5  $\mu$ l of lysate or 25  $\mu$ l of supernatant was applied, respectively. **b.** The immunofluorescence analysis of the cellular localization of endogenous ANGPTL8 protein in HepG2 cells. Data are representative of three independent experiments.

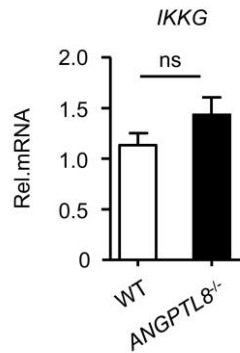

**Supplementary Figure 4. Effects of ANGPTL8 deficiency on the transcription of IKK $\gamma$ .** *ANGPTL8*<sup>-/-</sup> and control cell lines were lysed and then total RNA was extracted for the detection of *IKKG* mRNA. Data are shown as mean  $\pm$  SEM, unpaired two-tailed student's test was used for statistics, n=3, ns:  $p>0.05$ . Data are representative of three independent experiments.

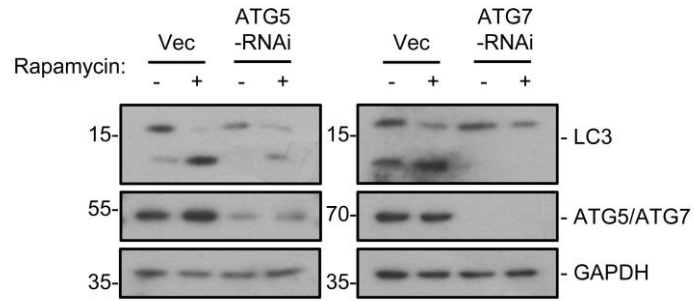

**Supplementary Figure 5. Effects of rapamycin-induced LC3 turnover in the control or ATG5/7-RNAi cell lines.** ATG5/7-RNAi or control HEK293T cell lines were treated with rapamycin (0.5  $\mu\text{g/ml}$ ) for 12 hours, then cells were harvested and subjected to immunoblots.

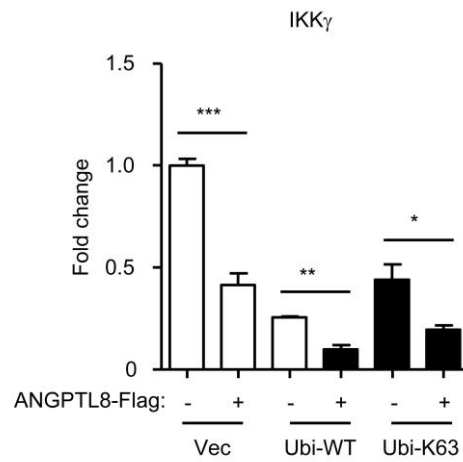

**Supplementary Figure 6. Quantitative densitometric results of the effects of ubiquitin on the ANGPTL8-mediated IKK $\gamma$  degradation.** GAPDH was used as the loading control. Data are shown as mean $\pm$  SEM, unpaired two-tailed student's test was used for statistics, n=3 independent experiments, \* $p < 0.05$ , \*\* $p < 0.01$ , \*\*\* $p < 0.001$ .

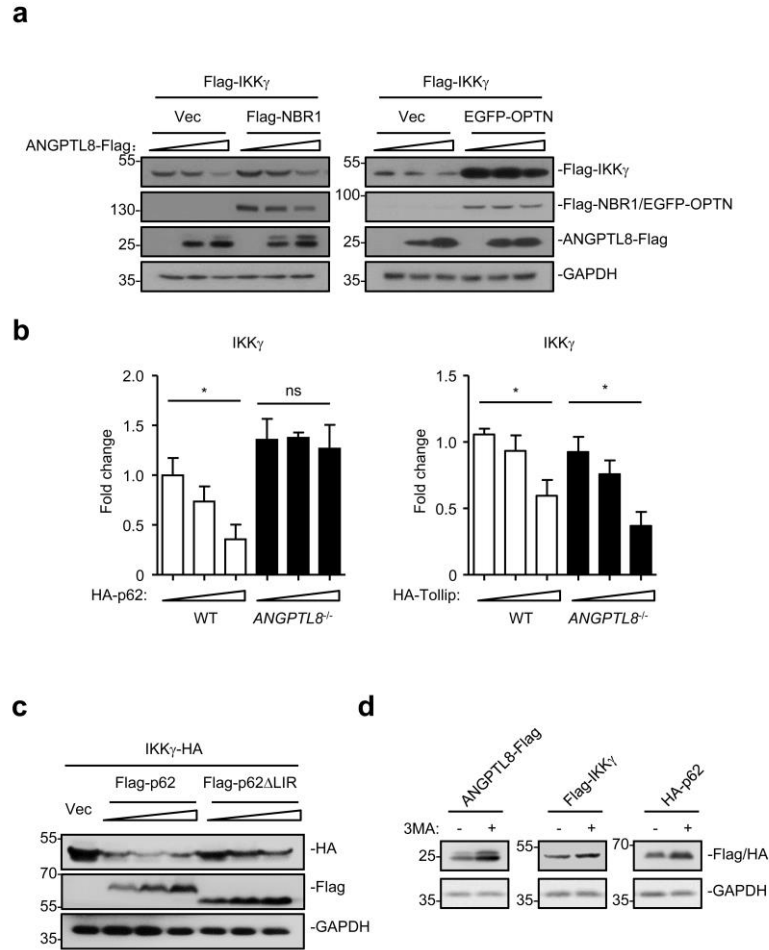

**Supplementary Figure 7. Autophagy receptor p62 mediates IKK $\gamma$  degradation in an**

**ANGPTL8-dependent manner. a.** Autophagy adaptor NBR1 and OPTN do not mediate the

degradation of IKK $\gamma$  in HEK293T cells. **b.** The quantitative densitometric results of the

overexpression of p62- and Tollip- mediated IKK $\gamma$  degradation in *ANGPTL8*<sup>-/-</sup> or control

cells. GAPDH was used as the loading control (n=3 independent experiments). **c.** The effects

of the overexpression of full length and  $\Delta$ LIR truncation mutants of p62-mediated IKK $\gamma$

degradation. **d.** Overexpressed ANGPTL8, IKK $\gamma$  and p62 degrade via autophagy in

HEK293T cells. Cells were transfected with indicated plasmids for 24 hours before treated

by 3MA (335  $\mu$ M) for 6 hours. Data are shown as mean  $\pm$  SEM, unpaired two-tailed

student's test was used for statistics (**b**), \**p* < 0.05, ns: *p* > 0.05. Data are representative of

three independent experiments.

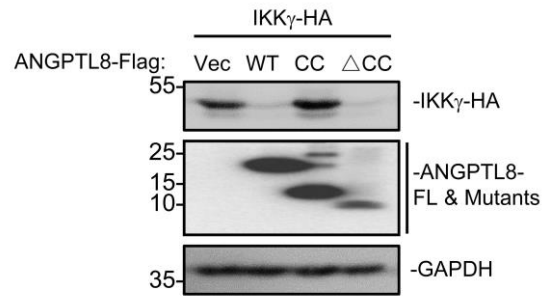

**Supplementary Figure 8. Effects of ANGPTL8 coiled-coil (CC) domain on the ANGPTL8-mediated IKK $\gamma$  degradation.** HEK293T cells were transfected with indicated plasmids for 24 hours and immunoblots were performed with the indicated antibodies. Data are representative of three independent experiments.



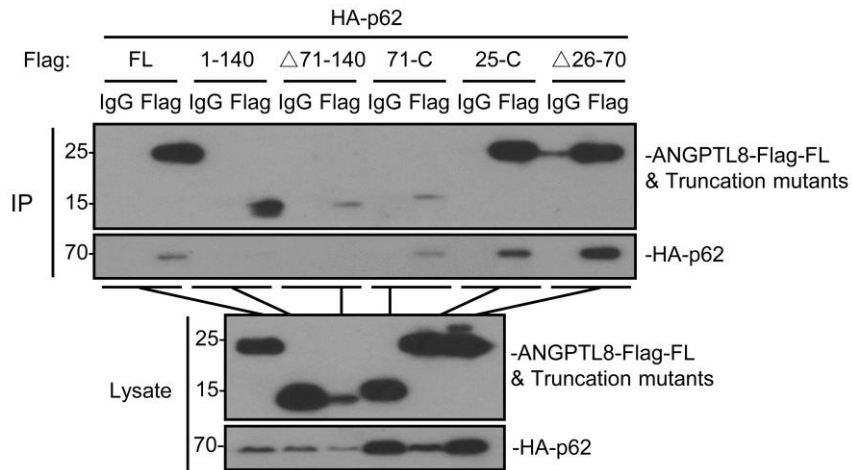

**Supplementary Figure 9. Domain mapping of the interaction between ANGPTL8 and p62.** HEK293T cells were transfected with indicated plasmids for 24 hours. Co-IP analysis and immunoblots were performed with the indicated antibodies. Data are representative of three independent experiments.

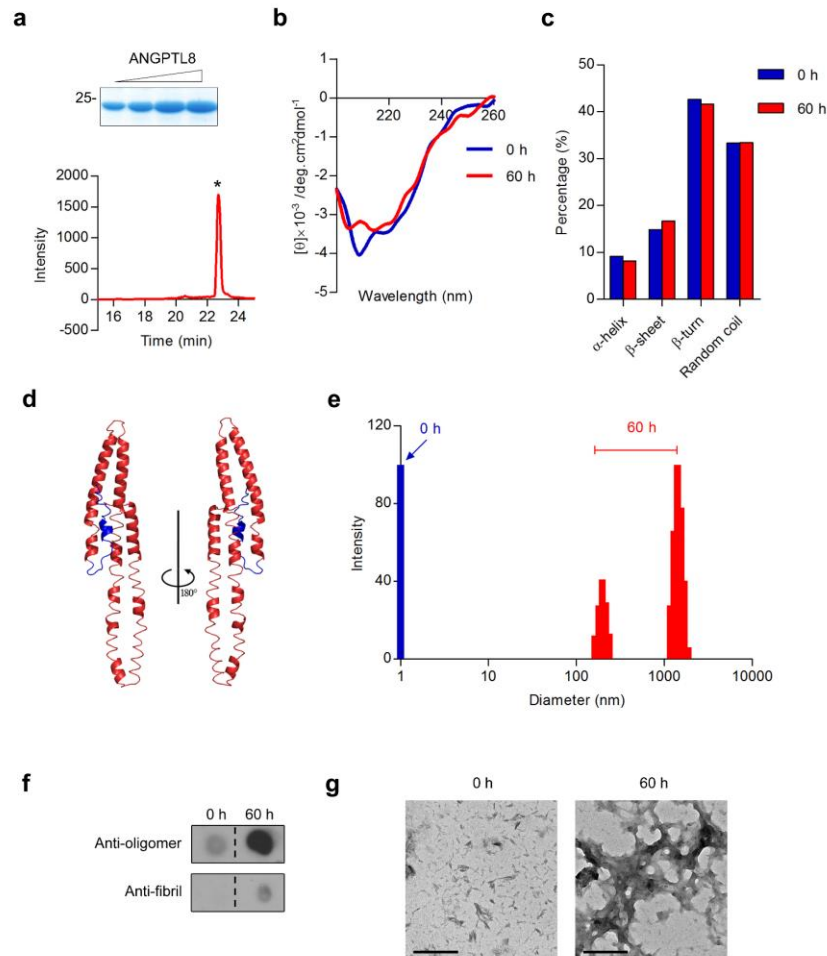

**Supplementary Figure 10. The aggregation and structural characteristics of ANGPTL8.**

**a.** SDS-PAGE of expressed ANGPTL8 (*up* panel) and RP-HPLC purification of ANGPTL8 (*bottom* panel). **b.** Far-UV circular dichroism spectra of ANGPTL8 (incubated in 25 mM PBS, pH 7.4, containing 50 mM NaCl) at 37°C for 0 and 60 hours, the percentage of secondary structure was quantified with CDPro and shown in (**c**). **d.** The simulated structure of ANGPTL8, blue represents residues 1-25, red represents residues 26-198; **e.** The average particle diameters of ANGPTL8 aggregates generated upon incubation (0 and 60 hours; blue and red, respectively) measured by dynamic light scattering. **f.** The oligomerization and fibrillation of ANGPTL8 detected by dot blot using A11 and OC antibody, respectively. **g.** TEM image of ANGPTL8 incubated for 0 and 60 hours, scale bar represents 200 nm. Data are representative of three independent experiments (**b,e**).

**a**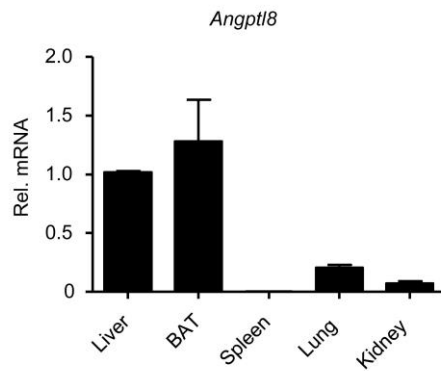**b**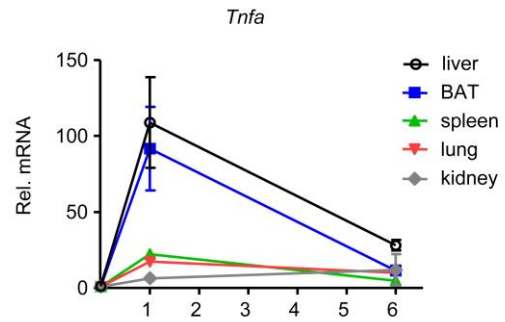

**Supplementary Figure 11. Potential involvement of ANGPTL8 in acute inflammation caused by infection. a.** The transcription profile of *Angptl8* in various tissues (n=3). **b.** The transcription of *Tnfa* in C57bl/6 mice after intraperitoneal injection of LPS (3 mg/kg). For 0 and 1 hours, n=3; for 6 hours, n=4. Data are shown as mean  $\pm$  SEM, unpaired two-tailed student's test was used for statistics

**Figure 1**

**b**

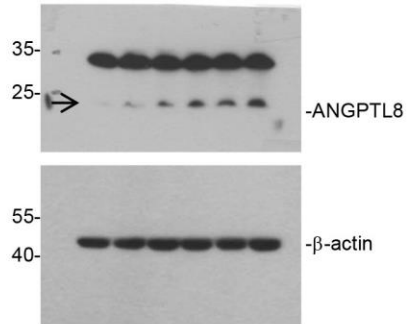

**c**

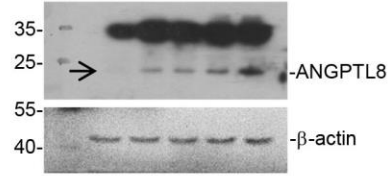

**Figure 2**

**a**

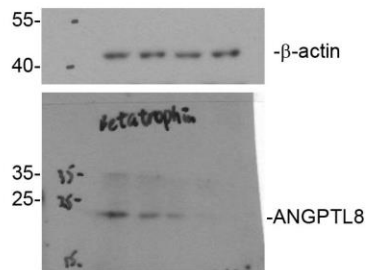

**e**

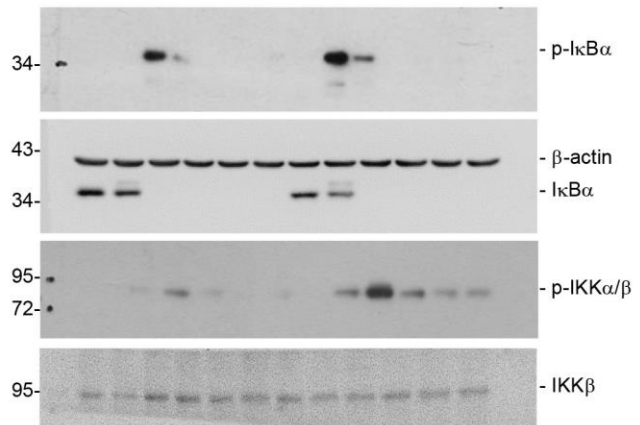

**Figure 3**

**b**

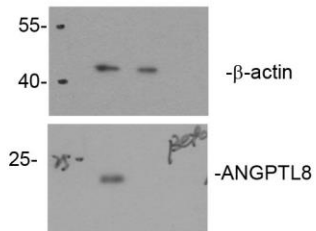

**f**

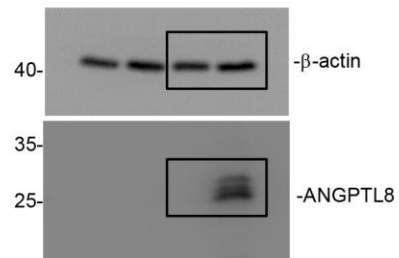

**Supplementary Figure 12. The original immunoblots films for figure 1-3.**

**Figure 4**

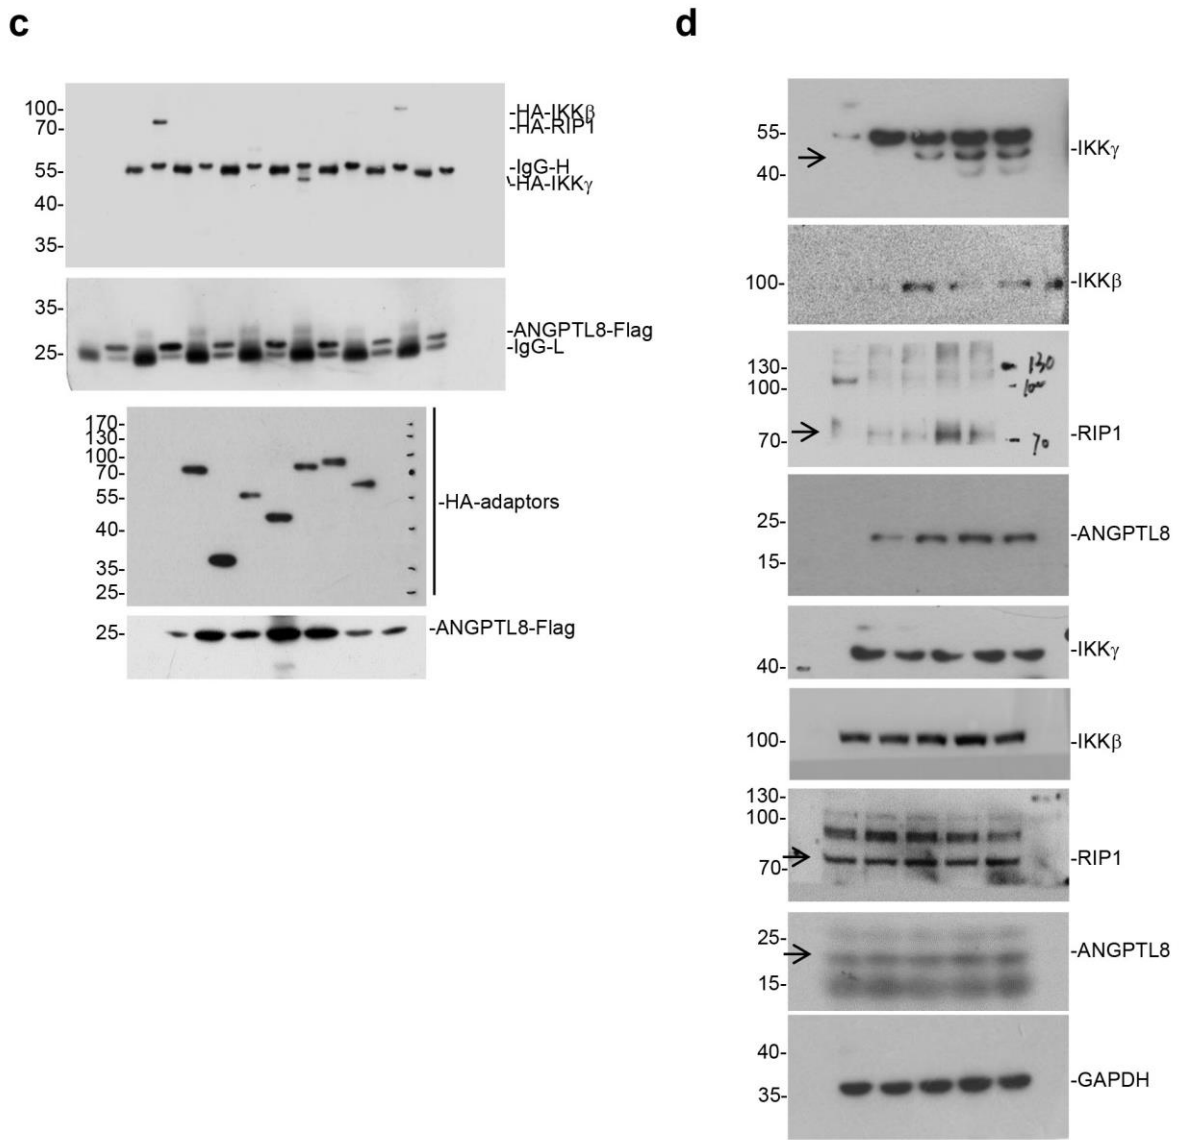

**Supplementary Figure 13. The original immunoblots films for figure 4.**

**Figure 5**

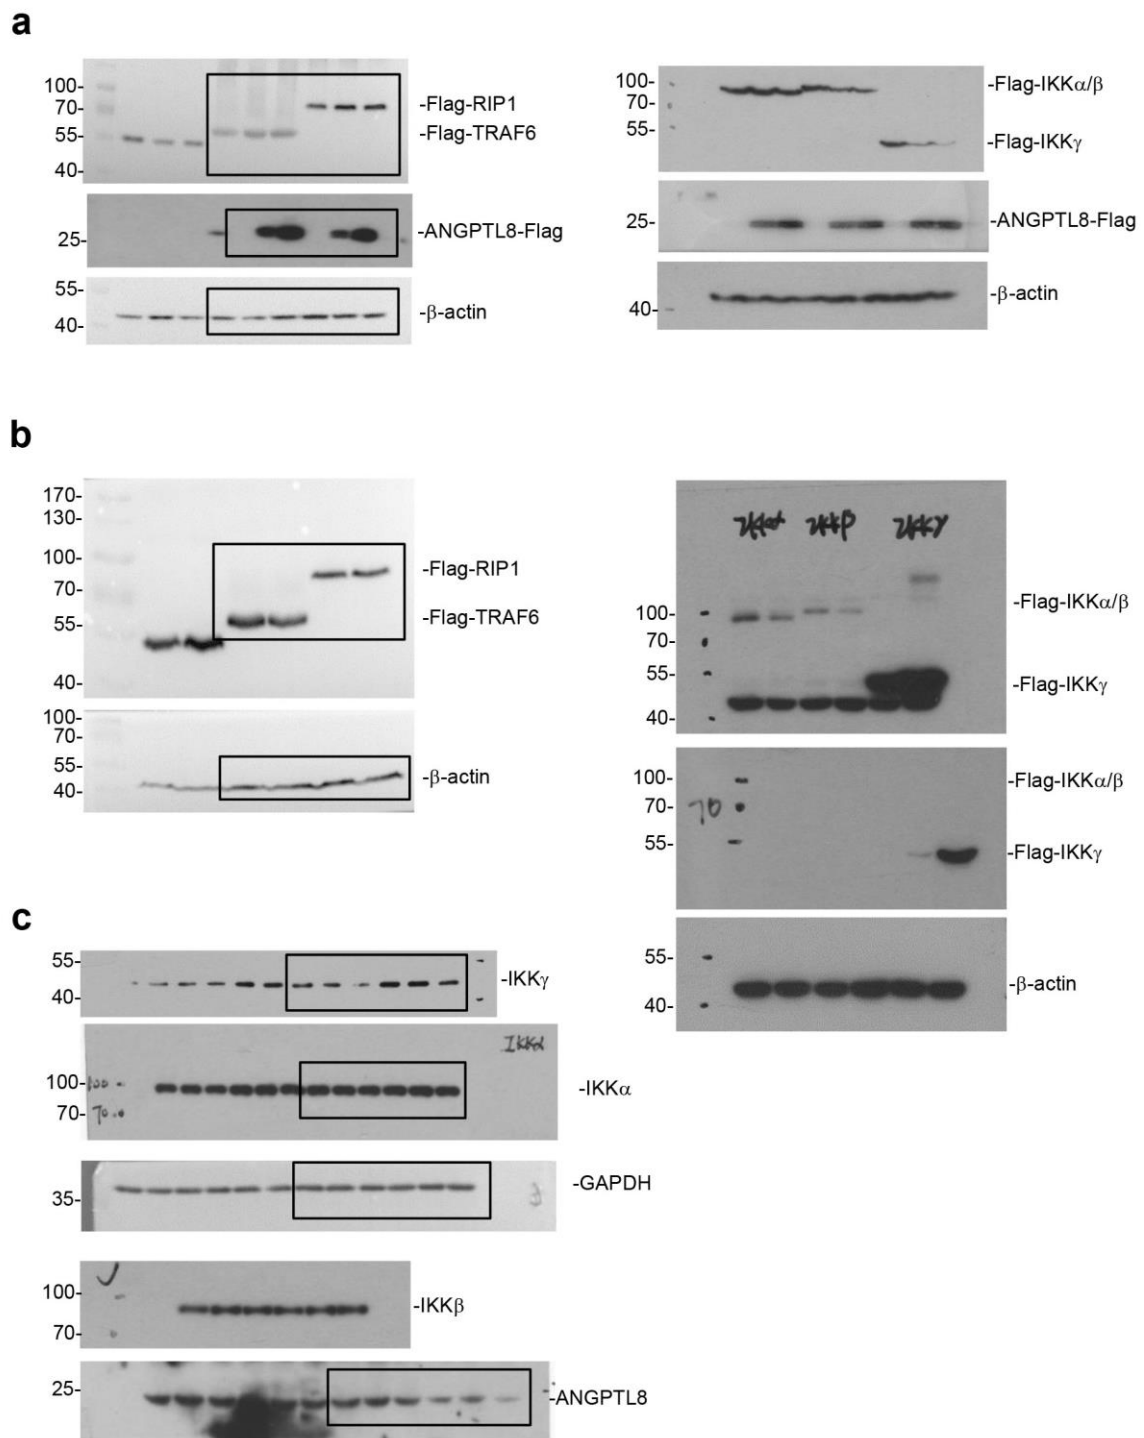

**Supplementary Figure 14. The original immunoblots films for figure 5.**

**Figure 6**

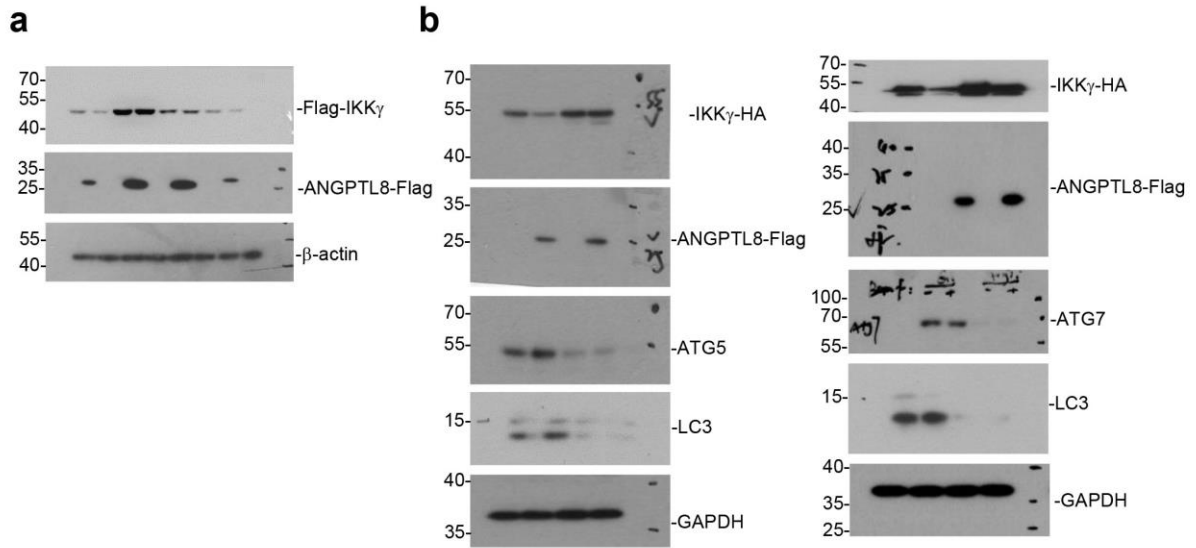

**Figure 7**

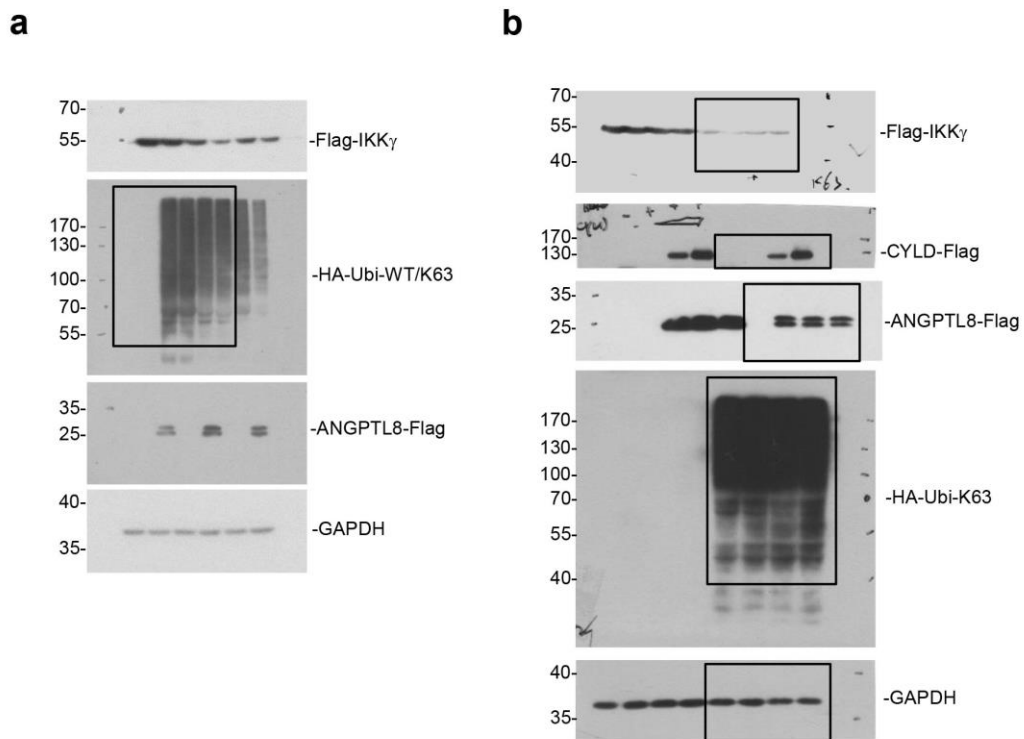

**Supplementary Figure 15. The original immunoblots films for figure 6 and 7a,b.**

**Figure 7 (Continued)**

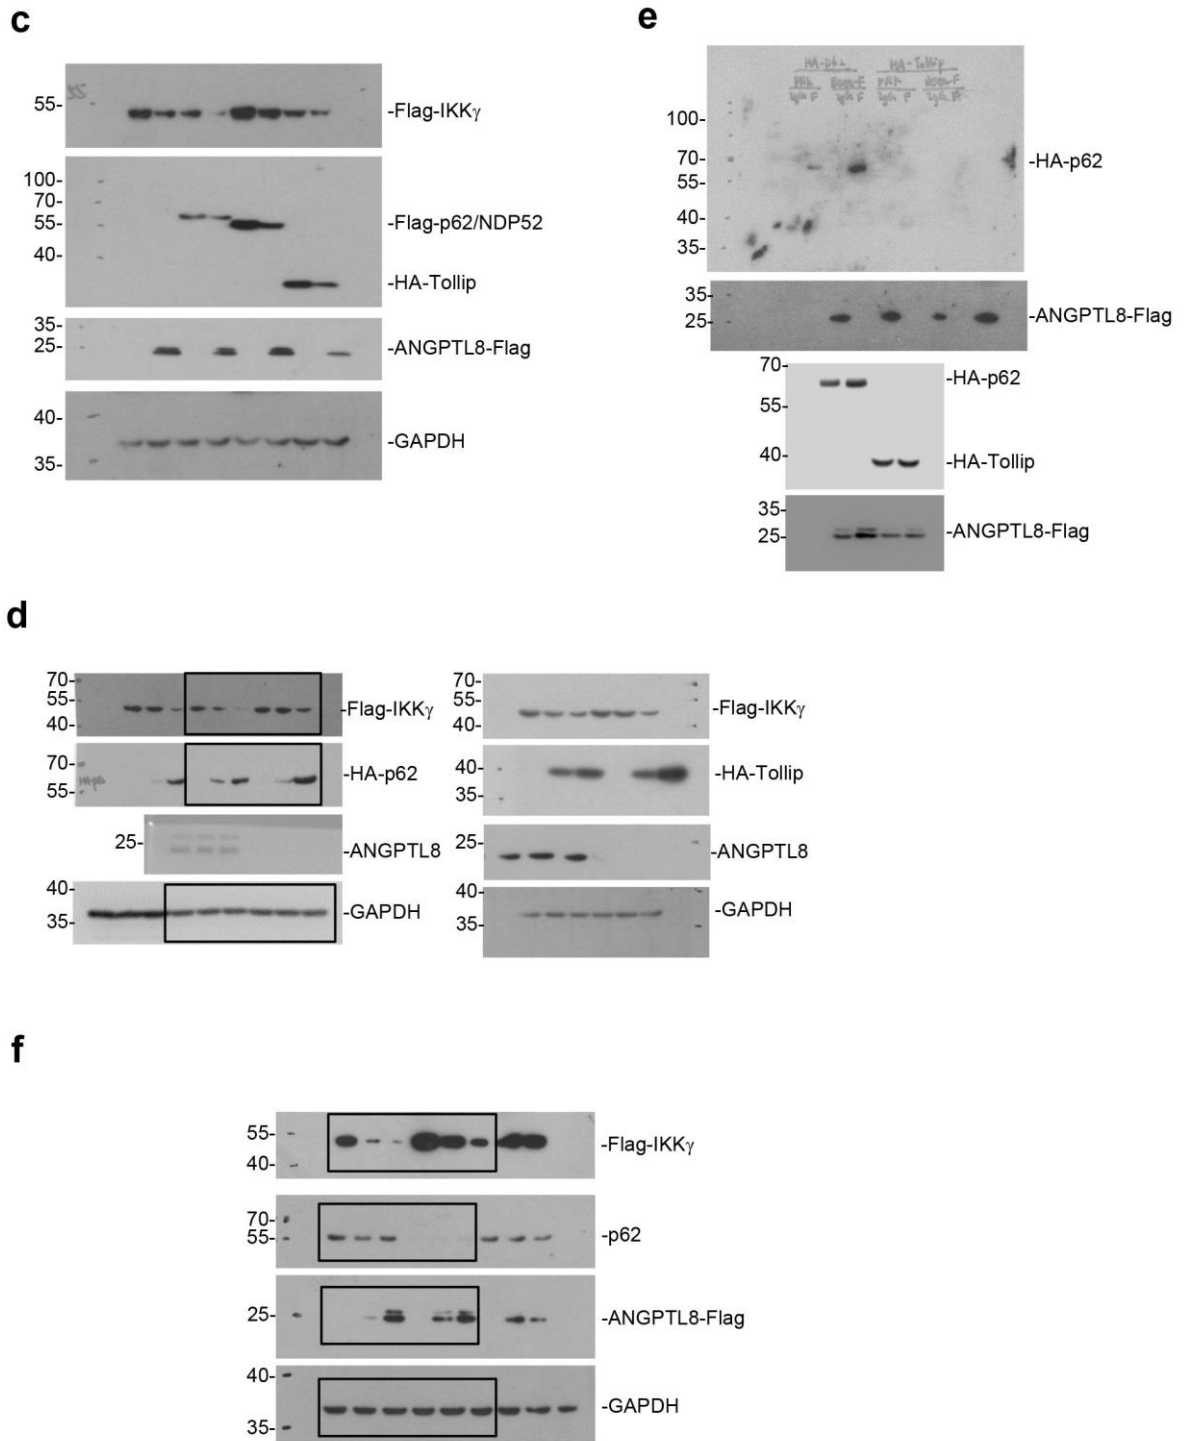

**Supplementary Figure 16. The original immunoblots films for figure 7c,d,e,f.**



**Figure 8**

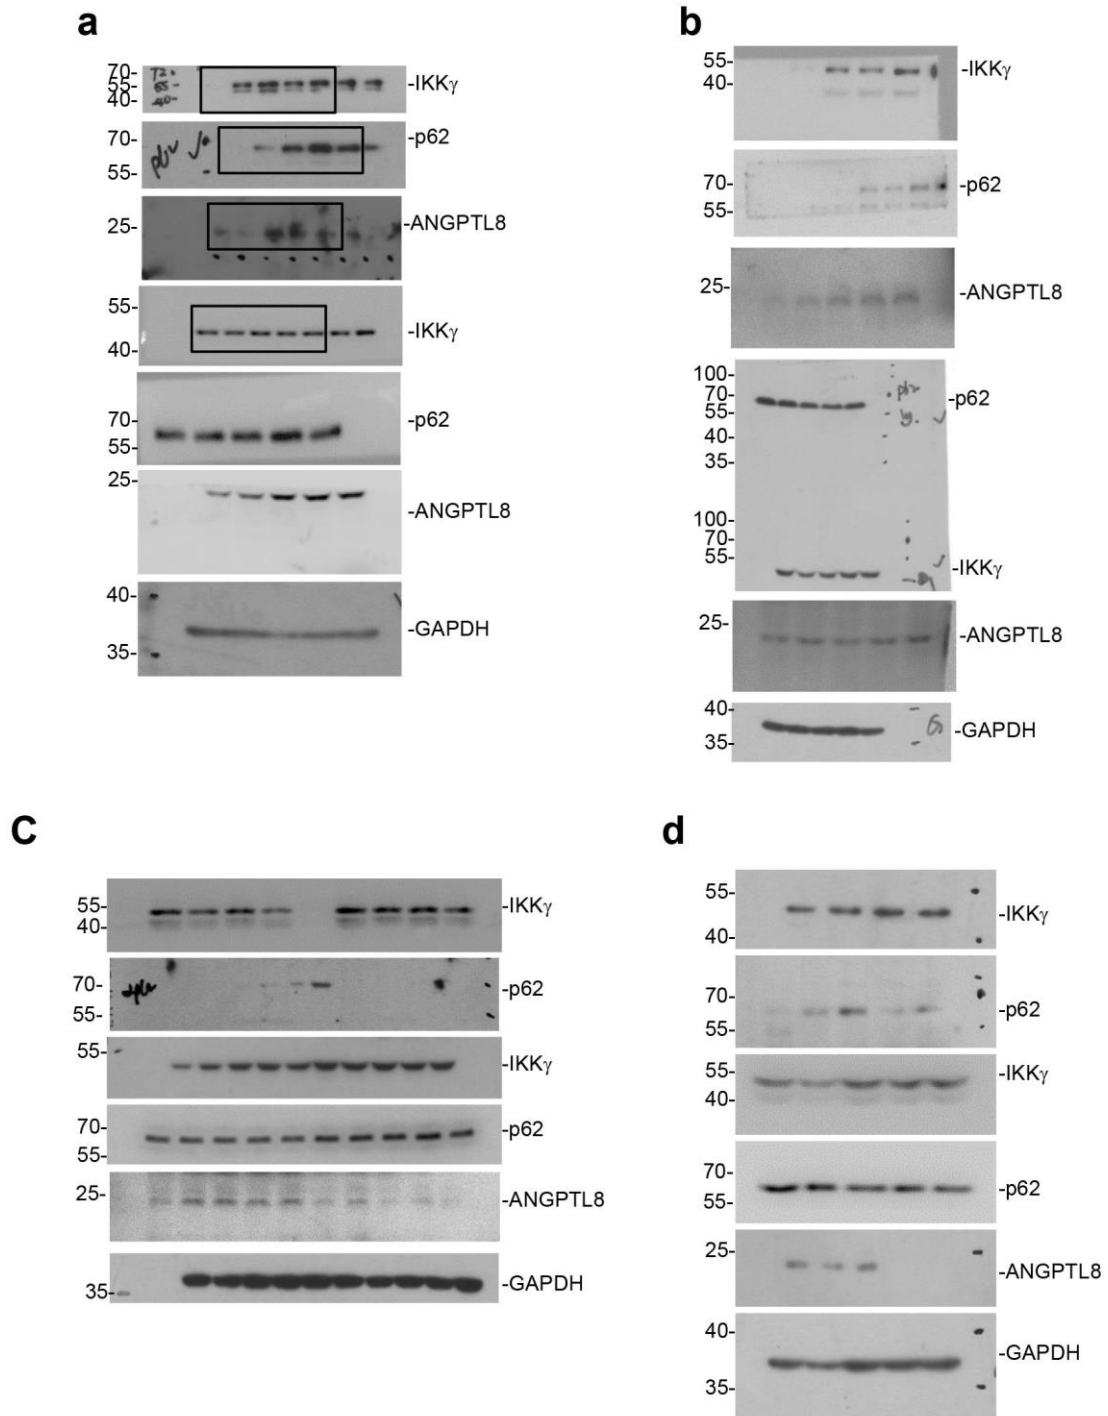

**Supplementary Figure 17. The original immunoblots films for figure 8.**

**Figure 9**

**a**

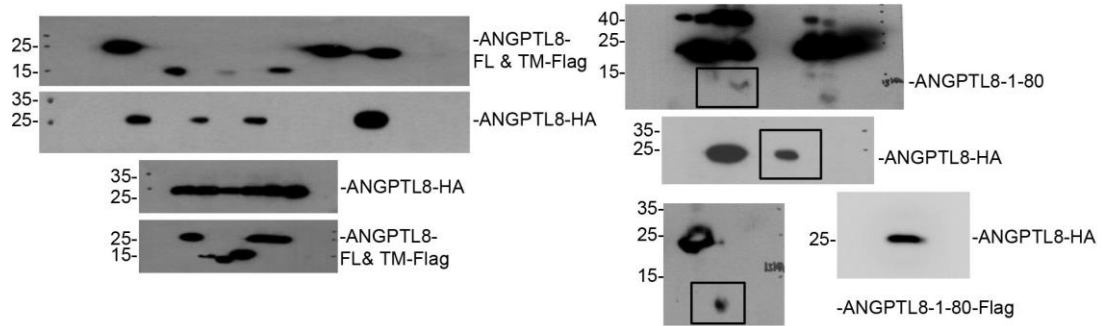

**c**

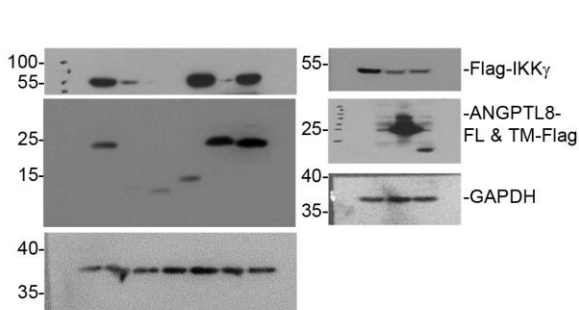

**d**

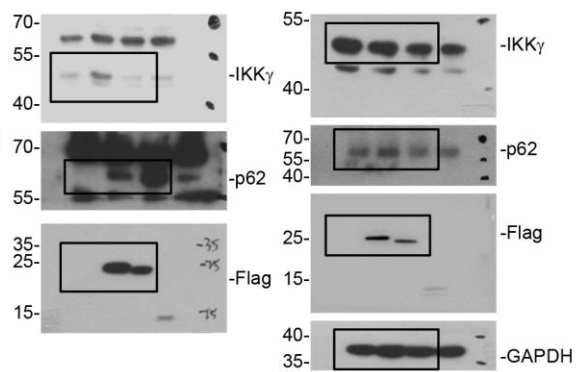

**f**

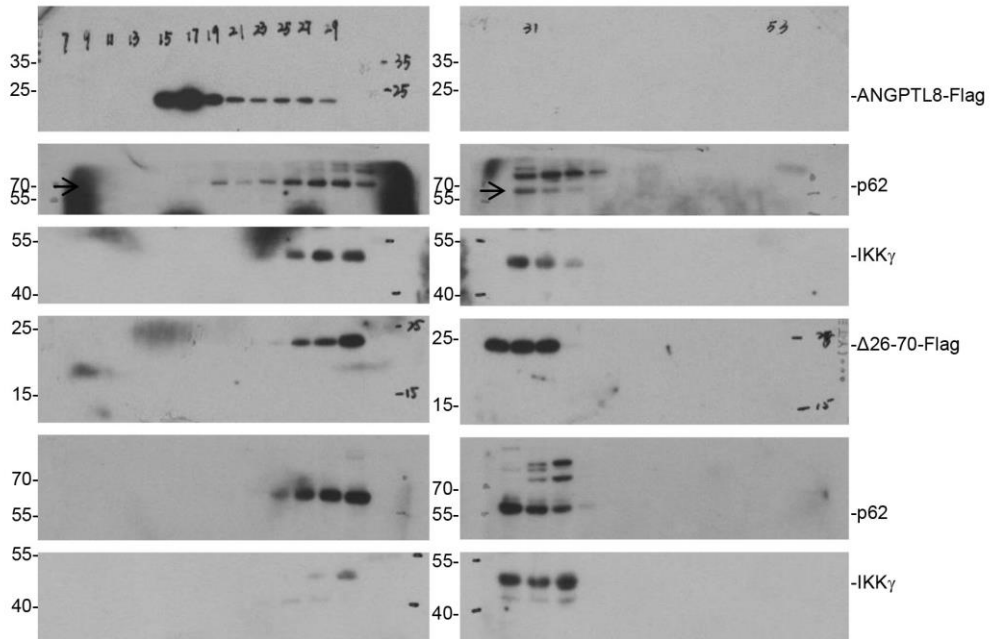

**Supplementary Figure 18. The original immunoblots films for figure 9.**

**Figure 10**

**b**

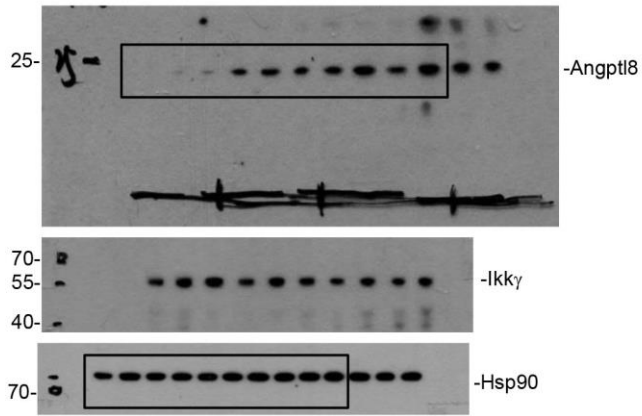

**d**

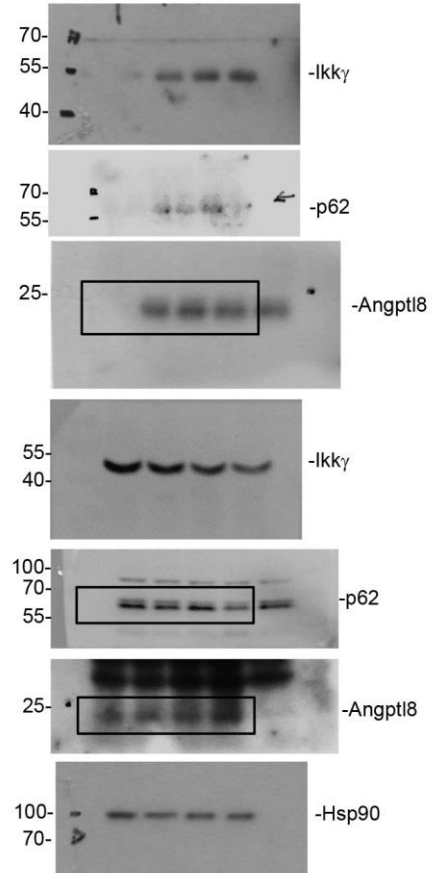

**Supplementary Figure 19. The original immunoblots films for figure 10.**

### Supplementary figure 1

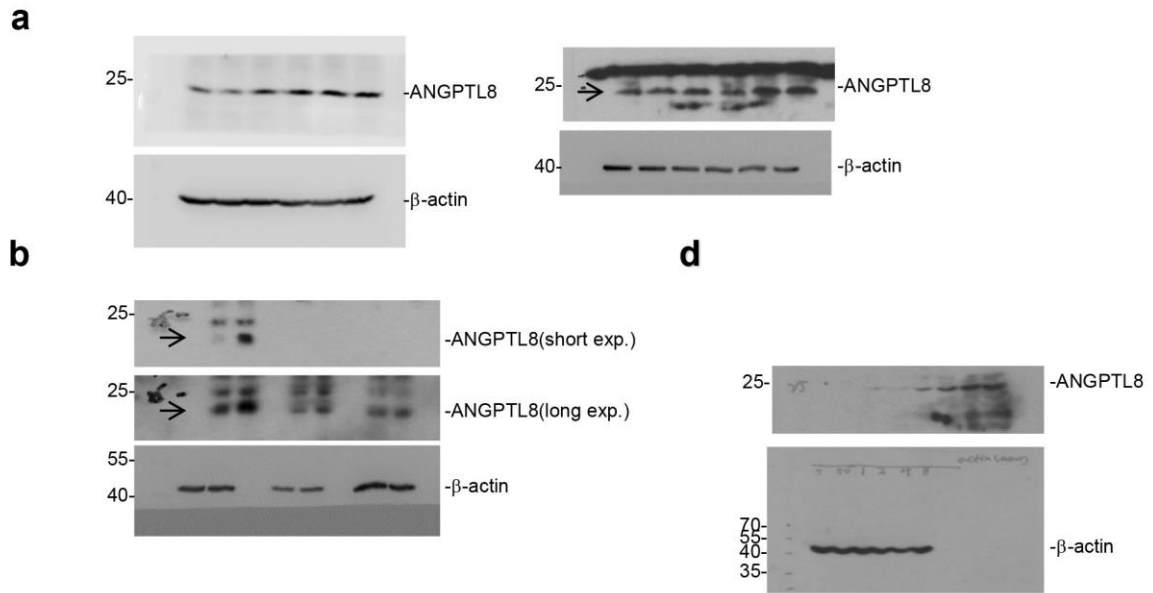

### Supplementary figure 3

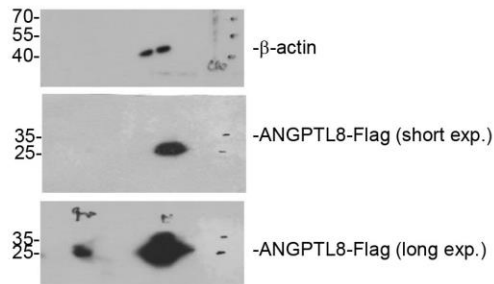

### Supplementary figure 5

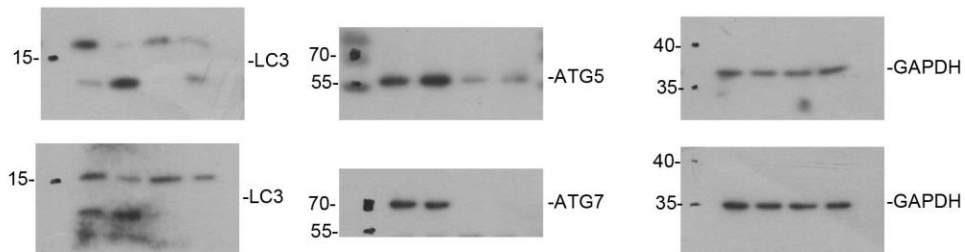

Supplementary Figure 20. The original immunoblots films for Supplementary figure 1,3,5.

## Supplementary figure 7

**a**

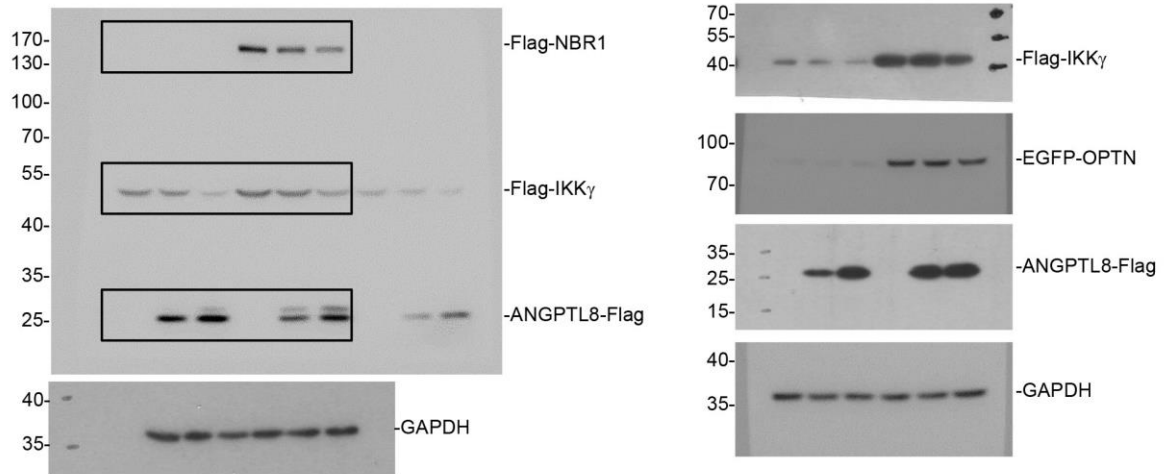

**c**

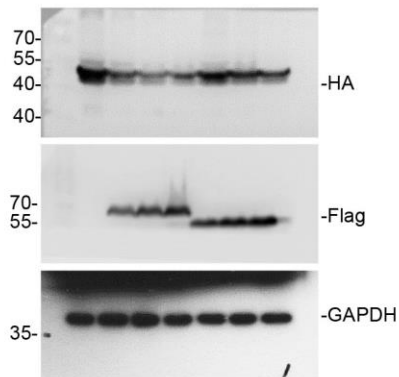

**d**

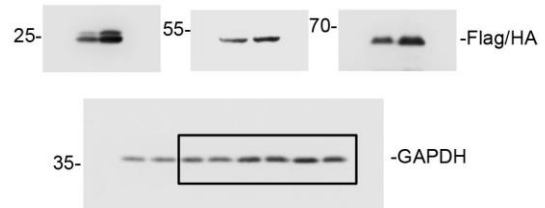

**Supplementary Figure 21. The original immunoblots films for Supplementary figure 7.**

### Supplementary figure 8

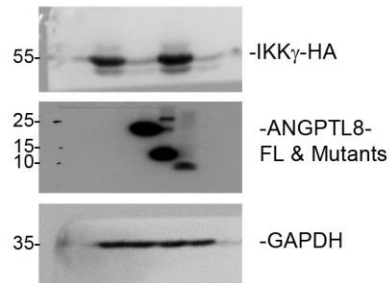

### Supplementary figure 9

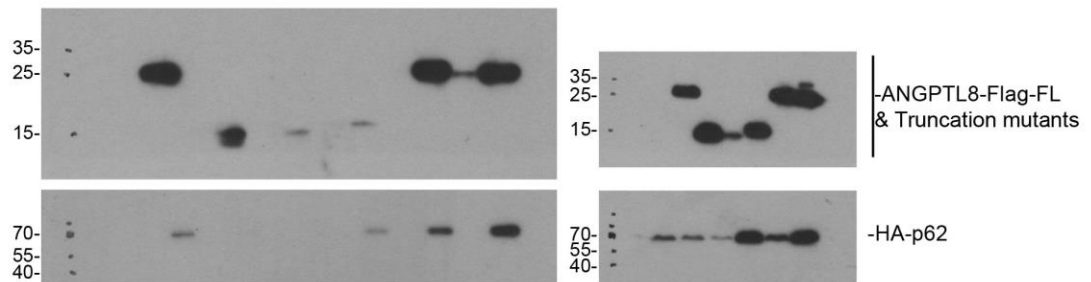

### Supplementary figure 10

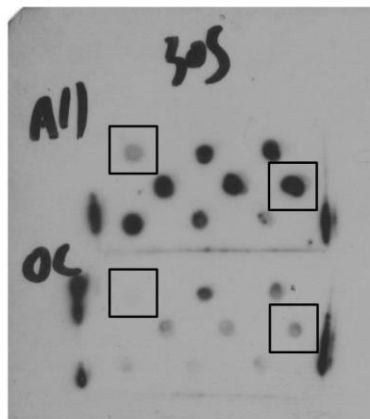

Supplementary Figure 22. The original immunoblots films for Supplementary figures 8-10.

**Supplementary Table 1. Information of human blood samples**

| Healthy Control |   |    |                 | Patients with acute inflammation |   |    |                               |            |                 |            |   |    |                                         |                   |                 |
|-----------------|---|----|-----------------|----------------------------------|---|----|-------------------------------|------------|-----------------|------------|---|----|-----------------------------------------|-------------------|-----------------|
| Serial NO.      | G | A  | ANGPTL8 (pg/mL) | Serial NO.                       | G | A  | Clinical diagnosis            | PCT (mg/L) | ANGPTL8 (pg/mL) | Serial NO. | G | A  | Clinical diagnosis                      | Endotoxin (EU/mL) | ANGPTL8 (pg/mL) |
| N-01            | F | 59 | 2773.87         | PCT-01                           | M | 52 | Bacteremia                    | 22.2       | 4137.63         | E-01       | M | 73 | Pneumonia                               | 41.44             | 6382.23         |
| N-02            | M | 46 | 902.50          | PCT-02                           | M | 53 | Pneumonia                     | 4.45       | 4325            | E-02       | M | 93 | Gastric ulcer with hemorrhage           | 0.85              | 16936.9         |
| N-03            | F | 23 | 757.50          | PCT-03                           | M | 71 | Herpes zoster                 | 7.11       | 3187.5          | E-03       | M | 73 | Pneumonia                               | >50               | 11325           |
| N-04            | F | 54 | 2912.95         | PCT-04                           | M | 52 | Renal failure                 | 16.2       | 6672.5          | E-04       | M | 42 | Acute upper gastrointestinal hemorrhage | 1.14              | 8855            |
| N-05            | M | 39 | 1552.50         | PCT-05                           | F | 61 | Infective fever               | 0.93       | 8340.93         | E-05       | M | 70 | Severe pneumonia                        | 3.14              | 11100           |
| N-06            | F | 31 | 526.25          | PCT-06                           | M | 90 | Cerebral insufficiency        | 0.82       | 5886.25         | E-06       | F | 65 | obstructive pulmonary emphysema         | 0.13              | 7305            |
| N-07            | F | 45 | 1962.57         | PCT-07                           | F | 54 | Pneumonia                     | 8.48       | 8887.5          | E-07       | F | 54 | Pneumonia                               | 27.37             | 15362.5         |
| N-08            | F | 27 | 416.25          | PCT-08                           | F | 81 | Pneumonia                     | 0.57       | 8913.75         | E-08       | M | 91 | Pneumonia                               | 0.22              | 8422.5          |
| N-09            | F | 35 | 762.50          | PCT-09                           | M | 23 | Pneumonia                     | 0.64       | 7850            | E-09       | F | 53 | Acute renal failure                     | 0.27              | 7950            |
| N-10            | F | 43 | 1301.25         | PCT-10                           | F | 52 | Brachial plexus neuritis      | 0.96       | 1738.75         | E-10       | M | 91 | Acute obstructive cholangitis           | 0.27              | 10807.5         |
| N-11            | F | 60 | 1391.25         | PCT-11                           | F | 53 | Renal failure                 | 0.62       | 4850            |            |   |    |                                         |                   |                 |
| N-12            | F | 35 | 692.50          | PCT-12                           | M | 94 | Acute obstructive cholangitis | 11.83      | 6013.75         |            |   |    |                                         |                   |                 |

| Serial NO. | G | A  | ANGPTL8 (pg/mL) | Serial NO. | G | A  | Clinical diagnosis                     | PCT (mg/L) | ANGPTL8 (pg/mL) | Serial NO. | G | A | Clinical diagnosis | Endotoxin (EU/mL) | ANGPTL8 (pg/mL) |
|------------|---|----|-----------------|------------|---|----|----------------------------------------|------------|-----------------|------------|---|---|--------------------|-------------------|-----------------|
| N-13       | M | 22 | 947.50          | PCT-13     | F | 61 | Pneumonia;<br>Renal failure            | 4.51       | 7067.5          |            |   |   |                    |                   |                 |
| N-14       | F | 25 | 1305.00         | PCT-14     | F | 79 | Catagma                                | 1.89       | 5443.75         |            |   |   |                    |                   |                 |
| N-15       | M | 31 | 1021.25         | PCT-15     | M | 58 | Biliary tract<br>infection             | 1.67       | 3112.5          |            |   |   |                    |                   |                 |
| N-16       | F | 32 | 1213.75         | PCT-16     | M | 70 | Acute<br>Gastric<br>Mucosal<br>Lesions | 7.03       | 2646.25         |            |   |   |                    |                   |                 |
| N-17       | M | 43 | 2932.27         | PCT-17     | F | 76 | Pneumonia;<br>Chronic<br>renal failure | 27.51      | 6710            |            |   |   |                    |                   |                 |
| N-18       | F | 35 | 801.25          | PCT-18     | M | 91 | Acute<br>obstructive<br>cholangitis    | 0.93       | 8422.5          |            |   |   |                    |                   |                 |
| N-19       | F | 23 | 833.75          |            |   |    |                                        |            |                 |            |   |   |                    |                   |                 |
| N-20       | F | 33 | 813.75          |            |   |    |                                        |            |                 |            |   |   |                    |                   |                 |
| N-21       | F | 24 | 1153.75         |            |   |    |                                        |            |                 |            |   |   |                    |                   |                 |
| N-22       | F | 20 | 958.75          |            |   |    |                                        |            |                 |            |   |   |                    |                   |                 |
| N-23       | F | 31 | 1055.00         |            |   |    |                                        |            |                 |            |   |   |                    |                   |                 |
| N-24       | M | 43 | 1865.00         |            |   |    |                                        |            |                 |            |   |   |                    |                   |                 |
| N-25       | F | 53 | 1282.50         |            |   |    |                                        |            |                 |            |   |   |                    |                   |                 |
| N-26       | M | 36 | 683.75          |            |   |    |                                        |            |                 |            |   |   |                    |                   |                 |
| N-27       | F | 47 | 1688.75         |            |   |    |                                        |            |                 |            |   |   |                    |                   |                 |
| N-28       | F | 35 | 913.75          |            |   |    |                                        |            |                 |            |   |   |                    |                   |                 |
| N-29       | F | 51 | 1423.75         |            |   |    |                                        |            |                 |            |   |   |                    |                   |                 |
| N-30       | M | 45 | 1170.00         |            |   |    |                                        |            |                 |            |   |   |                    |                   |                 |

**Note:** Blood samples were freshly collected and kept in -80°C freezer till use. N: randomly chosen healthy subjects, whose blood were collected in the physical examination center; PCT: patients with positive detection of procalcitonin (>0.5mg/L); E: patients with positive detection of endotoxin (>0.1 EU/mL), a kind of lipopolysaccharide (LPS). NO. Number; G: gender; A: age



**Supplementary Table 2. Reagents and antibodies used in this study**

| <b>Antibodies/Reagents</b>     | <b>Vendor</b>             | <b>Catalog number</b> | <b>Dilution</b> |
|--------------------------------|---------------------------|-----------------------|-----------------|
| Recombinant human TNF $\alpha$ | Novoprotein               | C008                  | N/A             |
| Recombinant human IL-1 $\beta$ | PeptoTech                 | 200-01B               | N/A             |
| Recombinant human IFN $\gamma$ | PeptoTech                 | 300-02                | N/A             |
| 3-methyladenine, 3MA           | Sigma                     | M9281                 | N/A             |
| Chloroquine, CQ                | Sigma                     | C6628-25g             | N/A             |
| MG132                          | Selleck                   | S2619                 | N/A             |
| Flag                           | Sigma                     | F1804                 | 1:10000         |
| HA                             | Sigma                     | H3663                 | 1:10000         |
| p62                            | Sigma                     | 655M4816V             | 1:5000          |
| ANGPTL8                        | Sigma                     | SAB3501080            | 1:100           |
| $\beta$ -actin                 | Abcam                     | 133626                | 1:10000         |
| IKK $\gamma$                   | Abcam                     | ab178872              | 1:10000         |
| GAPDH                          | Cell Signaling Technology | 2118                  | 1:10000         |
| I $\kappa$ B $\alpha$          | Cell Signaling Technology | L35A5                 | 1:5000          |
| p-I $\kappa$ B $\alpha$        | Cell Signaling Technology | S32365A5              | 1:1000          |
| IKK $\beta$                    | Cell Signaling Technology | 8943S                 | 1:1000          |
| p-IKK $\alpha/\beta$           | Cell Signaling Technology | C84E11                | 1:1000          |
| IKK $\alpha$                   | Cell Signaling Technology | 2682S                 | 1:1000          |
| ATG5                           | Cell Signaling Technology | 8540P                 | 1:1000          |
| ATG7                           | Cell Signaling Technology | 2631P                 | 1:1000          |
| RIP1                           | Santa Cruz Biotechnology  | SC7881                | 1:1000          |
| Hsp90                          | BD                        | 03717                 | 1:5000          |
| Oligomer-specific antibody     | Merck Millipore           | A-11                  | 1:2000          |
| Fibril-specific antibody       | Merck Millipore           | OC                    | 1:2000          |

N/A, not applicable

**Supplementary Table 3. Primers or target sequences for specific genes used in this study**

| <b>Gene Name</b>                 | <b>Primers/target sequences</b> |
|----------------------------------|---------------------------------|
| <i>ANGPTL8</i> -F                | CCAGGCACAGAAGGTGCTAC            |
| <i>ANGPTL8</i> -R                | TGTGAGGGCCCATAGGATGT            |
| <i>IKKG</i> -F                   | AGGTGGAGCACCTGAAGAGA            |
| <i>IKKG</i> -R                   | CCTGGCATTCCTTAGTGGCA            |
| <i>Angptl8</i> -F                | CCCTCAATGGCGTGTACAGA            |
| <i>Angptl8</i> -R                | CCACCTGAATCTCCGACAGG            |
| <i>Tnfa</i> -F                   | GGTGATCGGTCCCCAAAGGGATGA        |
| <i>Tnfa</i> -R                   | TGGTTTGCTACGACGTGGGCT           |
| <i>ANGPTL8</i> -gRNA             | TGGTCCTGTACACACCGTTG            |
| <i>ANGPTL8</i> -identification-F | CGGCCAGTTAACGATTGAC             |
| <i>ANGPTL8</i> -identification-R | GTGGTCCTGTACACACCGTTG           |
| <i>ANGPTL8</i> -RNAi-#1          | CTGACAAAGGCCAGGAACAT            |
| <i>ANGPTL8</i> -RNAi-#2          | CTCAGATGGAGGAGGATAT             |
| <i>ANGPTL8</i> -RNAi-#3          | GACAGATCCAGGAGAGACT             |
| p62-RNAi                         | CTGGACCCATCTGTCTTCA             |
| IKK $\gamma$ -RNAi               | GAATGCAGCTGGAAGATCT             |
| ATG5-RNAi                        | GAAGCAGAACCATACTATT             |
| ATG7-RNAi                        | GGAGTCACAGCTCTTCCTT             |
